# Supplementary material for: Stable Isotope-Resolved Metabolomics Shows Metabolic Resistance to Anti-Cancer Selenite in 3D Spheroids versus 2D Cell Cultures
Source: Metabolites. 2018 Jul 10;8(3):40. doi: 10.3390/metabo8030040 (PMC6161115; doi:10.3390/metabo8030040)

## Supplementary materials

**Fig. S1. Higher selenite resistance of A549 or PANC1 spheroids is not due to lower Se accumulation than the 2D counterparts.**

A549 cells as 2D and 3D cultures were treated respectively with 6.25 and 10  $\mu$ M sodium selenite for 24 hr as in **Fig. S1**, while PANC1 cells as 2D and 3D cultures were treated with 10  $\mu$ M sodium selenite for 24 hr as in **Fig. S2**. The cells were quenched and extracted as in **Fig. 2**. The polar, protein, and remaining residue fractions were obtained and along with the treatment media, they were digested in nitric acid before analysis for total Se content by ICP-MS, as described in the Method. \*,  $p \leq 0.05$ ; \*\*,  $p \leq 0.01$ ; \*\*\*,  $p \leq 0.005$ ; \*\*\*\*,  $p \leq 0.001$ ; n=2.

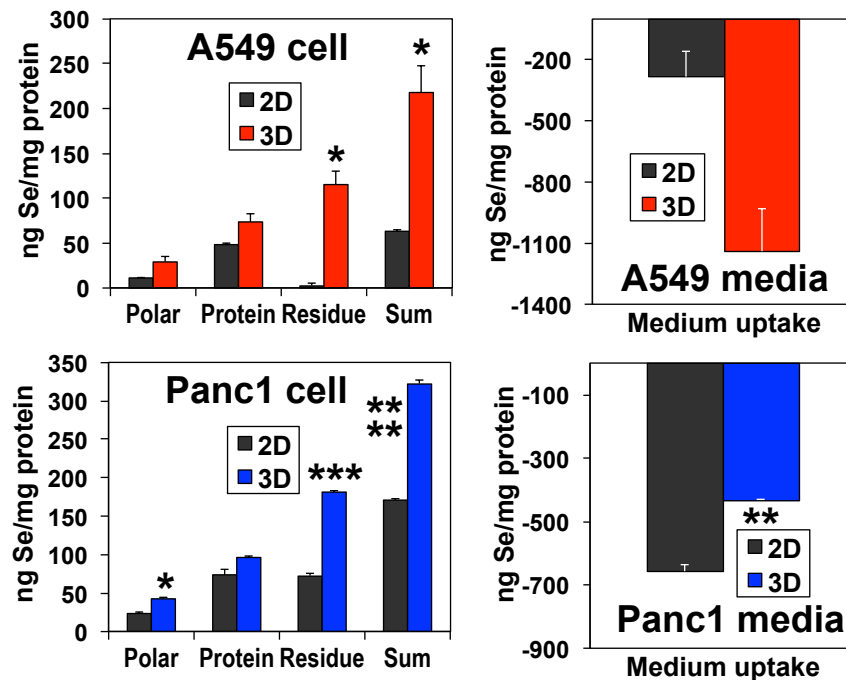

**Figure S2. A549 spheroids respond less to selenite than 2D cultures in terms of morphology, protein content, mitotic index, and necrosis.**

A549 cells from the 2D (**A**) or spheroid (**B**) SIRM experiments as described in the Materials and Methods were examined for their morphological changes in response to 24 h of 6.25 or 10  $\mu$ M selenite treatments, respectively. The red arrow in **A** points to vacuole formation in treated 2D cells. Also shown in **A** and **B** are the corresponding changes in extractable protein content from the initial 870,000 and 400,000 cells, respectively. In a parallel experiment, A549 spheroids were subjected to control and 100  $\mu$ M selenite treatment for 3 days, fixed in 70% methanol, and stained for nuclei using DAPI, mitotic index with PCNA antibody, and necrosis with RIP-1 antibody, as shown in **C**.

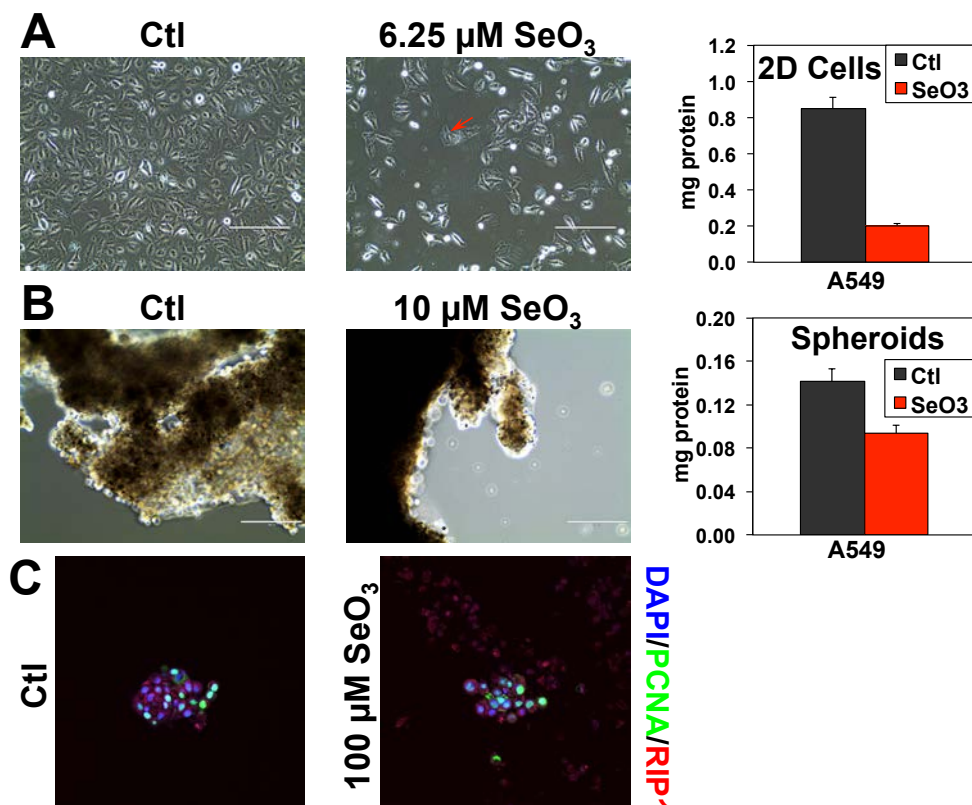

**Figure S3. PANC1 spheroids respond less to selenite than 2D cultures in terms of morphology, protein content, mitotic index, and necrosis.**

PANC1 cells from the 2D (**A**) or spheroid (**B**) SIRM experiments as described in the Materials and Methods were examined for their morphological changes in response to 24 h of 10  $\mu$ M selenite treatments. The red arrow in **A** points to vacuole formation in treated 2D cells. Also shown in **A** and **B** are the corresponding changes in extractable protein content from the initial 870,000 and 400,000 cells, respectively. In a parallel experiment, PANC1 spheroids were subjected to control and 100  $\mu$ M selenite treatment for 3 days, fixed in 70% methanol, and stained for nuclei using DAPI, mitotic index with PCNA antibody, and necrosis with RIP-1 antibody, as shown in **C**.

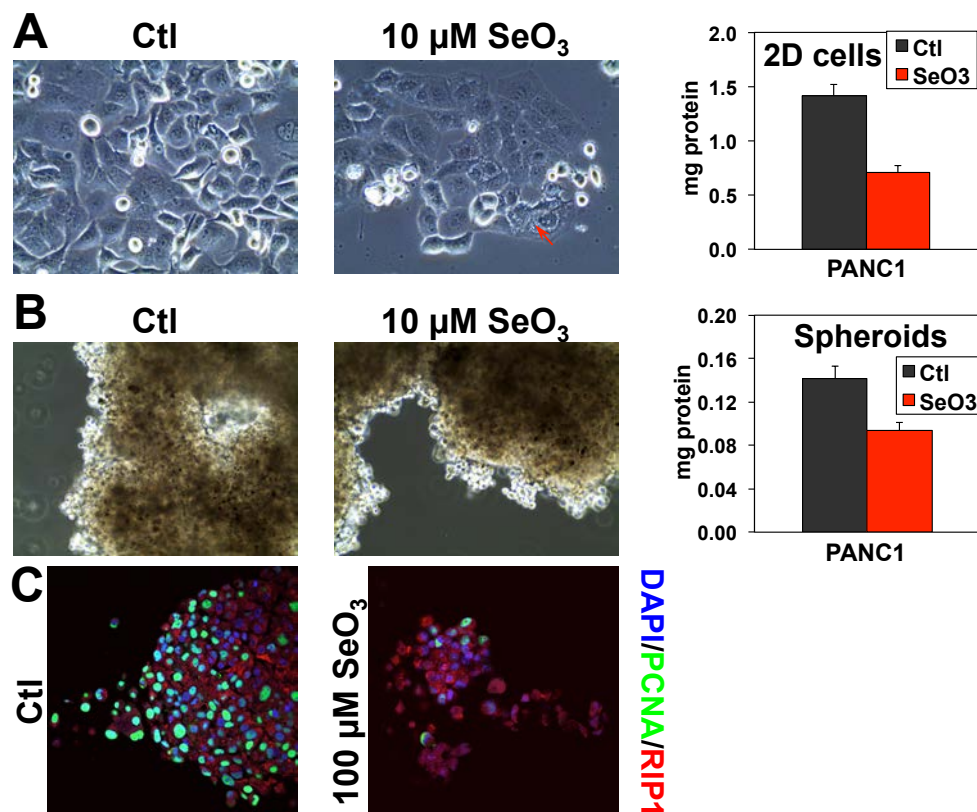

**Figure S4.  $^{13}\text{C}$  Atom-resolved tracing of the synthesis of  $^{13}\text{C}_2$ -acetyl CoA and  $^{13}\text{C}_1$ -isotopologues of Krebs cycle metabolites from  $^{13}\text{C}_6$ -glucose.**

Panel **A** illustrates the synthesis of  $^{13}\text{C}_1$ -malate (denoted by  $\bullet$ ) from  $^{13}\text{C}_6$ -Glc via the first turn of the canonical Krebs cycle and reversible reactions of malic enzyme (ME) as well as the production of  $^{13}\text{C}_2$ -acetyl CoA from PDH and ATP-citrate lyase (ACLY) activity. Panel **B** depicts an alternative route of  $^{13}\text{C}_1$ -malate synthesis via condensation of  $^{13}\text{C}_2$ -oxaloacetate derived from the first turn of the Krebs cycle with unlabeled acetyl-CoA, followed by the second turn reactions.

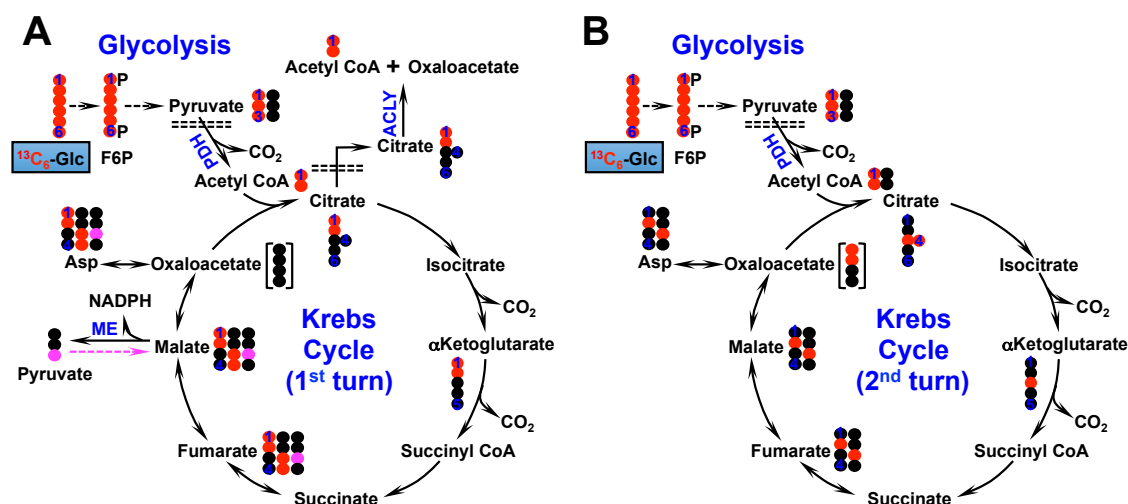

Supplement: Supplementary file 1 [file metabolites-08-00040-s001.pdf]
